# Supplementary material for: Bio-derived NiO nanoparticles from Colocasia esculenta leaf extract with enhanced antibacterial activity and efficient photocatalytic degradation of methylene blue
Source: Royal Society of Chemistry journal article supplement (doi:10.1039/d5ra08840b), 2026-01-01
Supplement: d5ra08840b1.pdf [file d5ra08840b1.pdf]

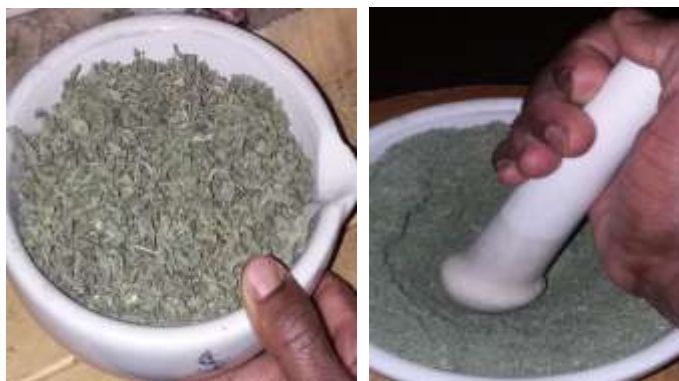

**Figure S1.** Representative photograph of the dried and powdered *Colocasia esculenta* leaves used as the starting material for extract preparation.

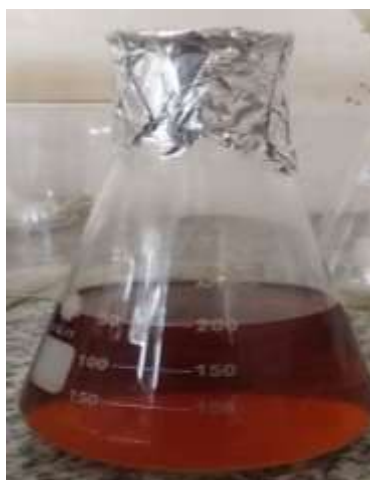

**Figure S2.** Photograph of the *Colocasia esculenta* leaf extract used for the synthesis of the NiO NPs.

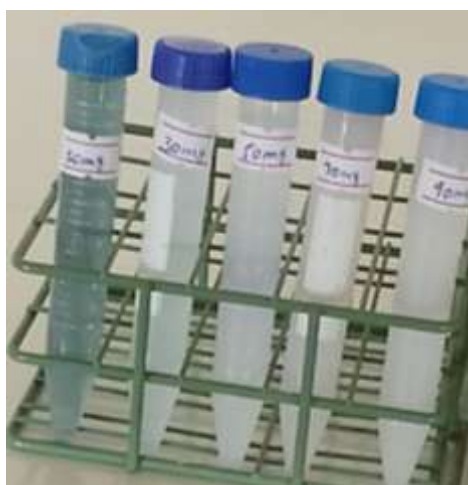

**Figure S3.** Time-dependent degradation of the target pollutant in the presence of the NiO NPs.
